# Supplementary material for: Effects of Combined Low Glutathione with Mild Oxidative and Low Phosphorus Stress on the Metabolism of Arabidopsis thaliana
Source: PubMed Central journal article supplement (PMC5581396; doi:10.3389/fpls.2017.01464), 2017-08-28
Supplement: Presentation_1.pdf [file Presentation_1.pdf]

**A**

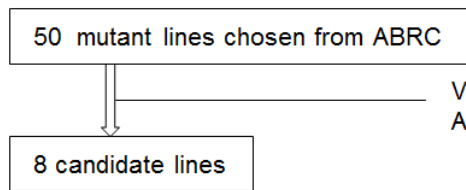

Visual phenotypes: leaf shape, color, and size  
Analysis for metabotyping: GC-TOF-MS

**B**

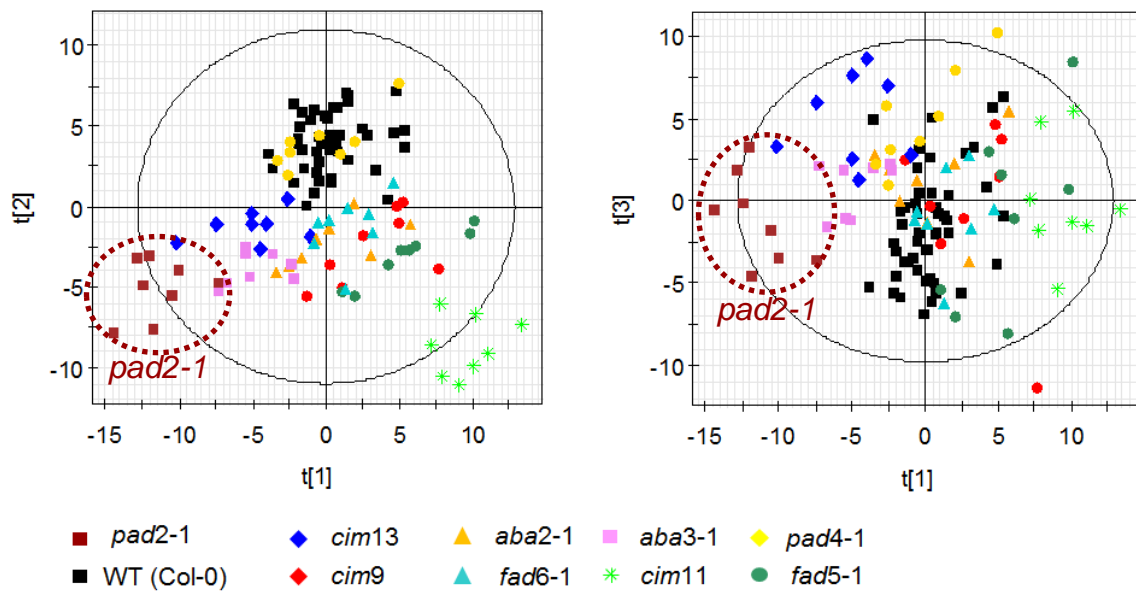

Fukushima et al., Supplemental Figure S1

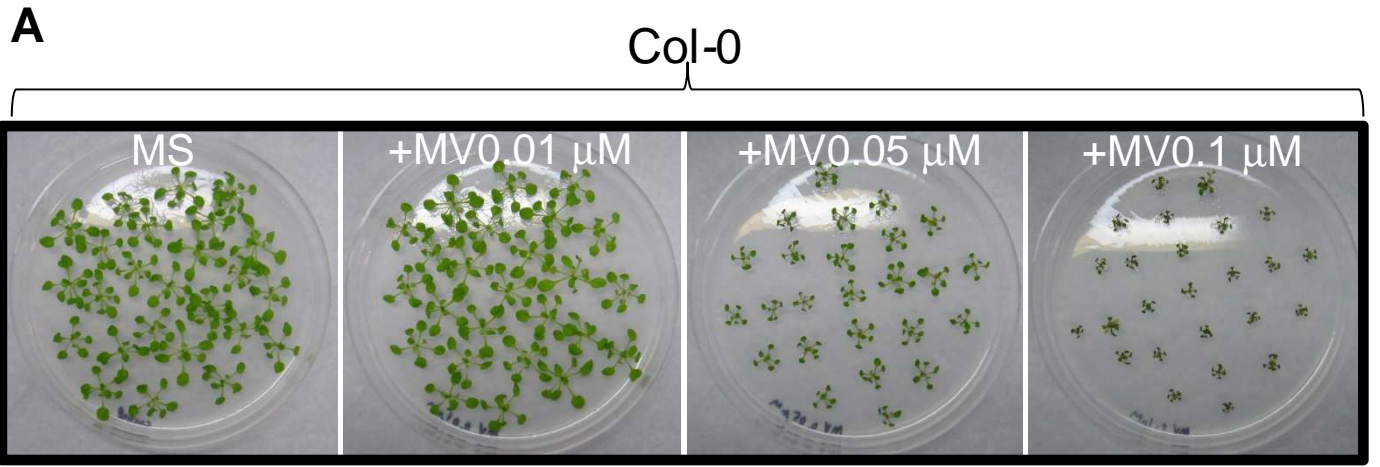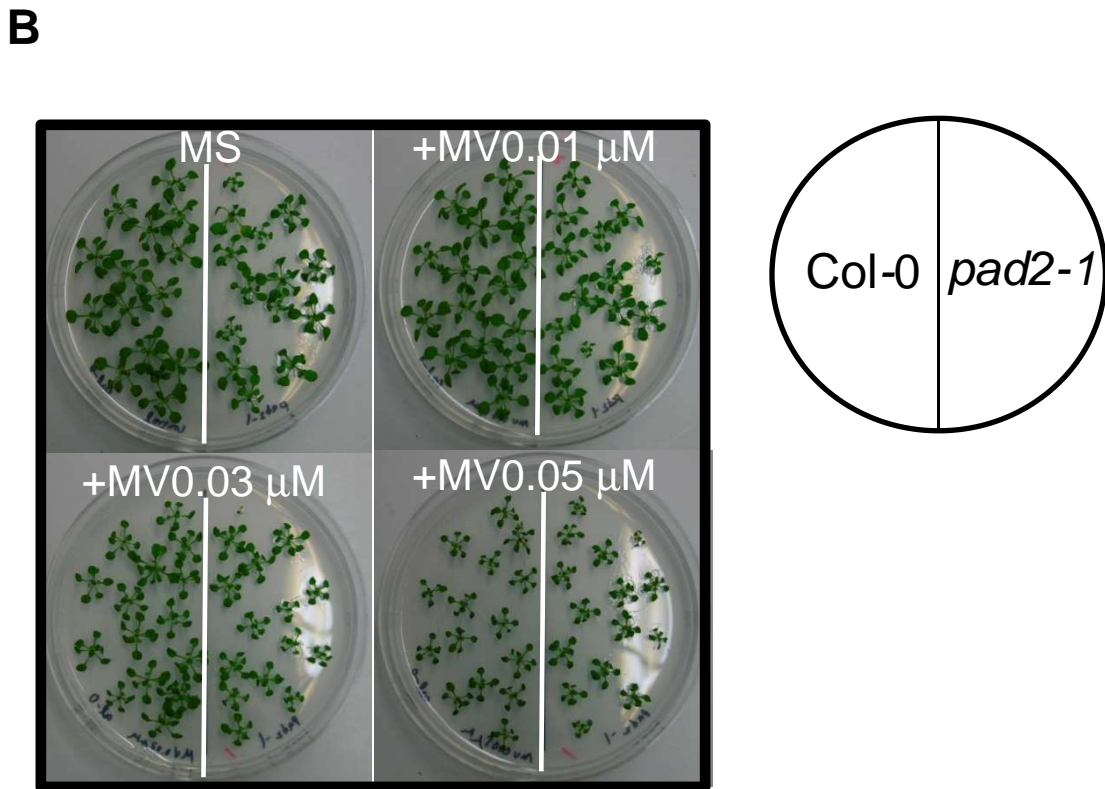

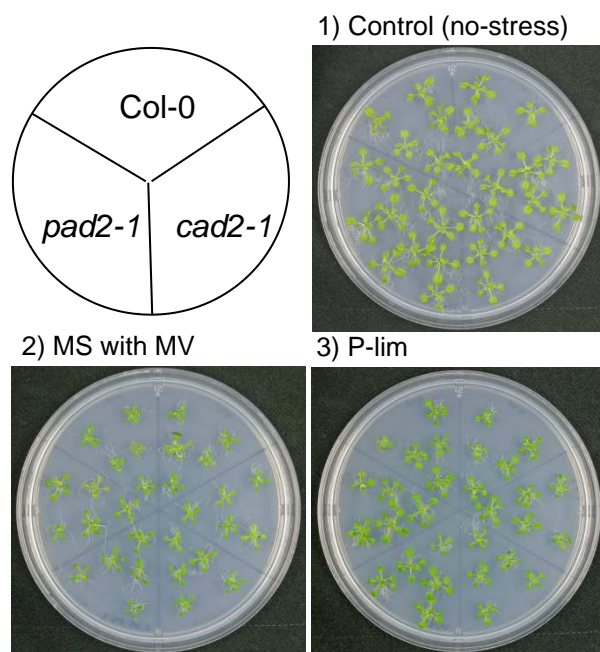

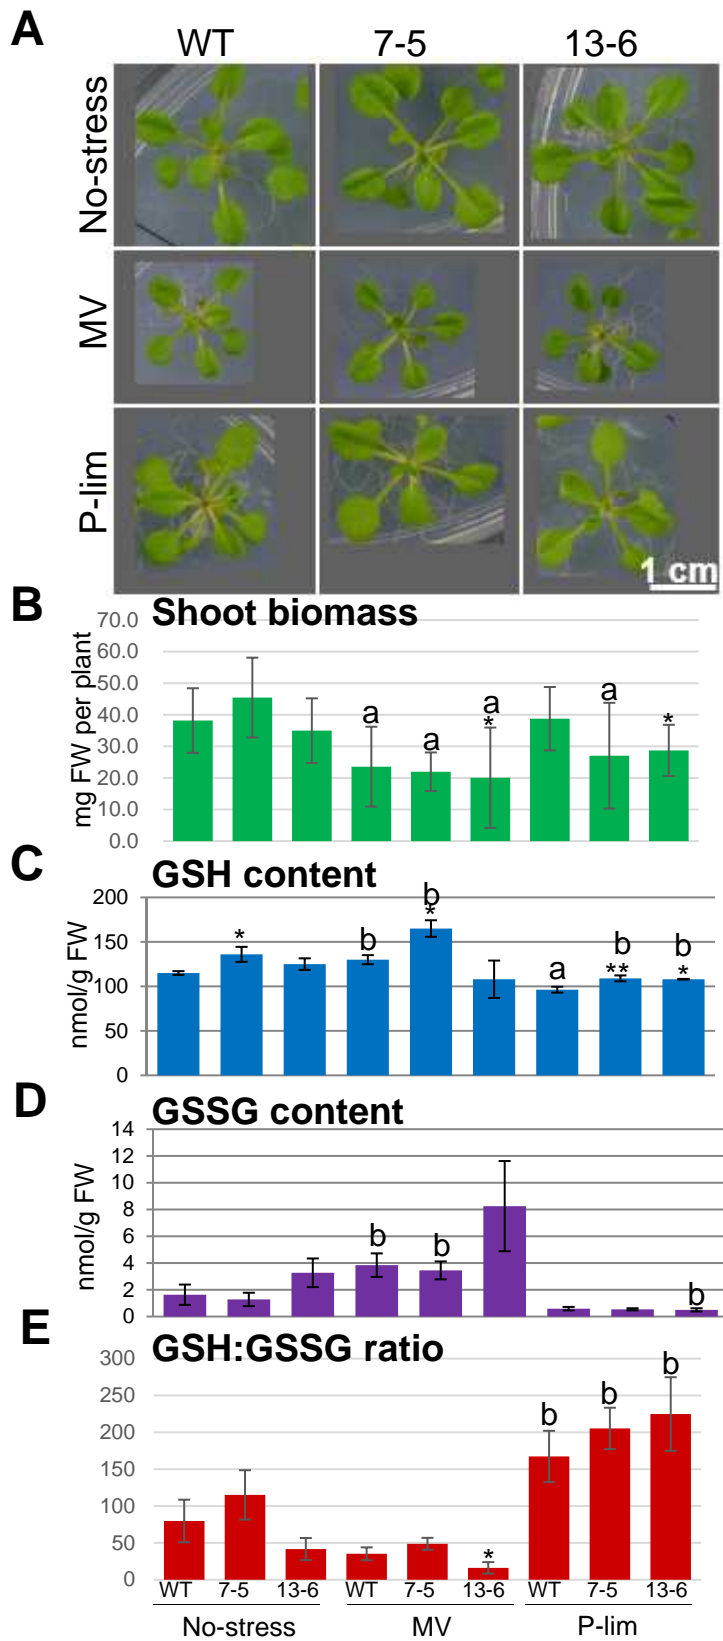

Fukushima et al., Supplemental Figure S4

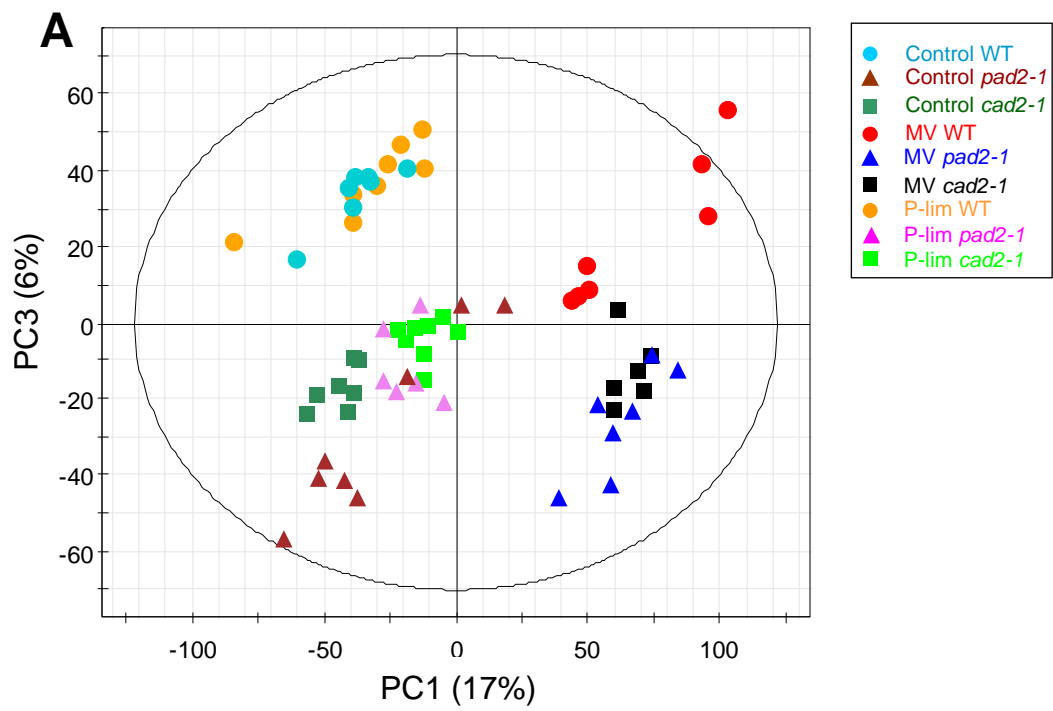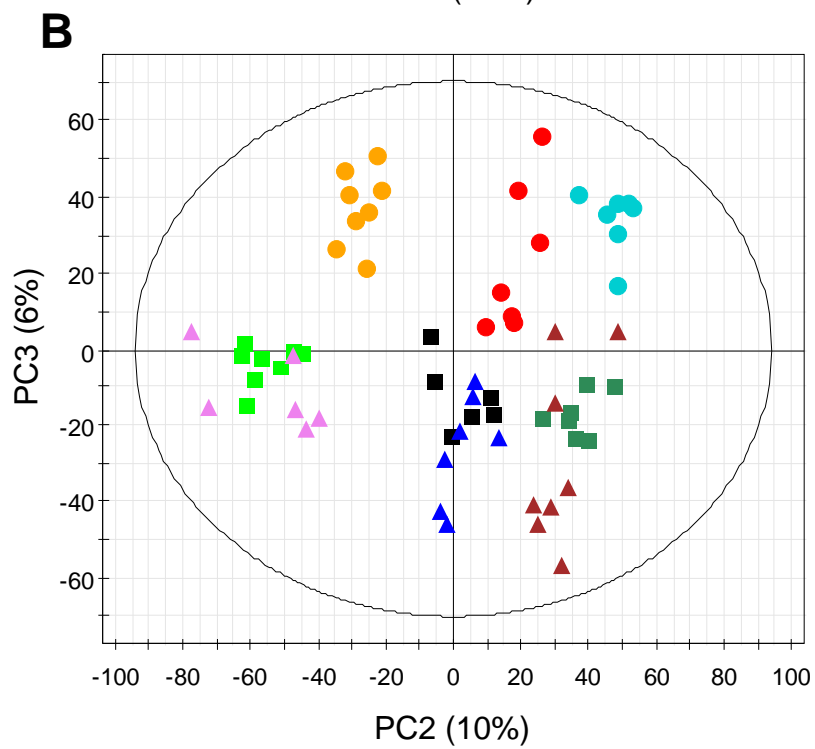

Fukushima et al., Supplemental Figure S5

**A****pad2 vs WT**(FDR < 0.05,  $|\log_2\text{fold-change}| \geq 1$ )**Increased metabolite set**      **Decreased metabolite set**

pad2 in ctrl

pad2 in MV

pad2 in ctrl

pad2 in MV

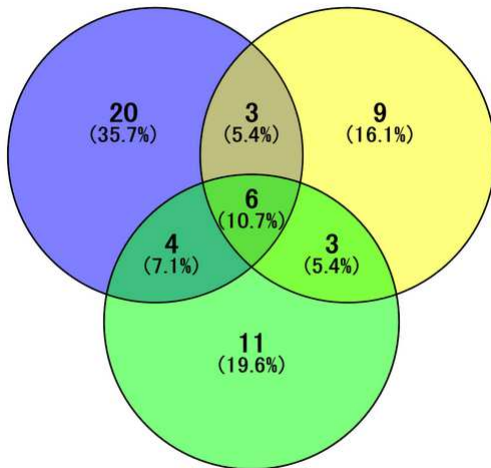

pad2 in P-lim

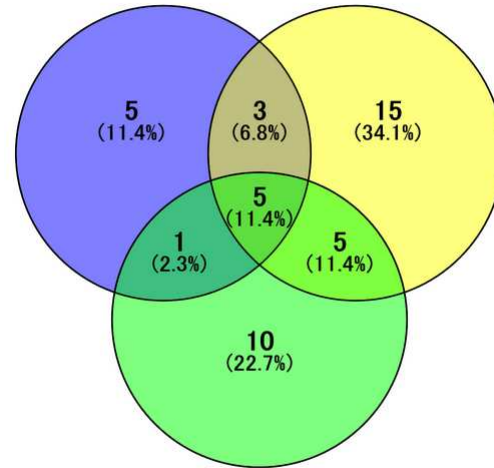

pad2 in P-lim

**B****cad2 vs WT**(FDR < 0.05,  $|\log_2\text{fold-change}| \geq 1$ )**Increased metabolite set**      **Decreased metabolite set**

cad2 in ctrl

cad2 in MV

cad2 in ctrl

cad2 in MV

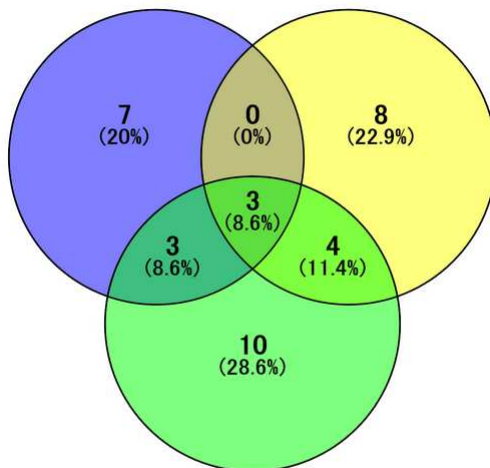

cad2 in P-lim

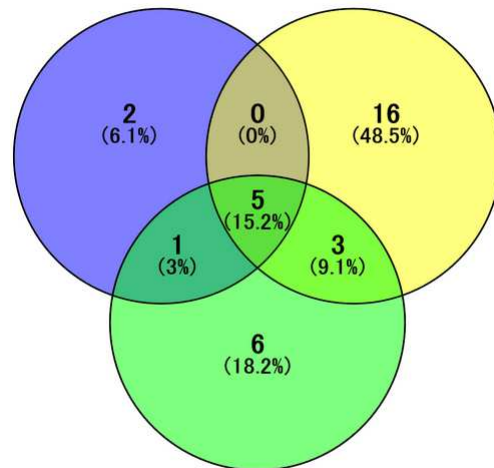

cad2 in P-lim

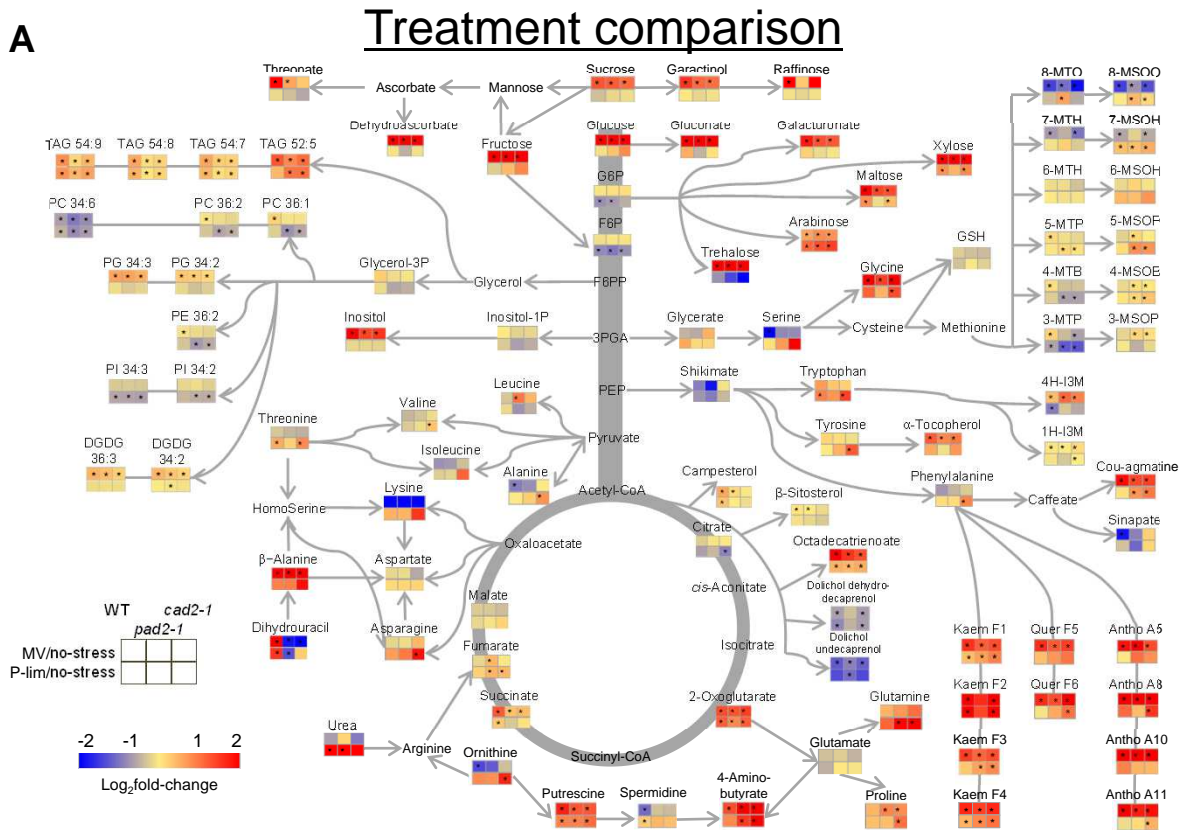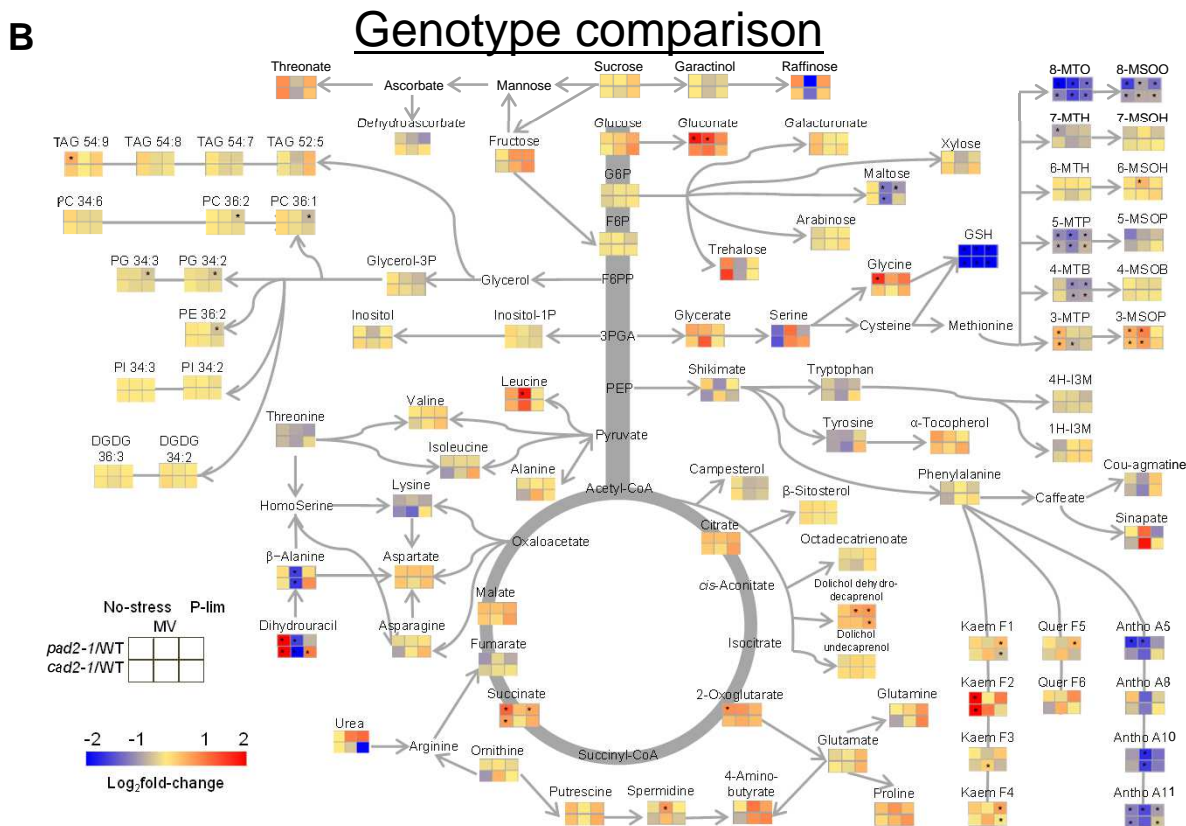

## A. Genotype comparison under MV

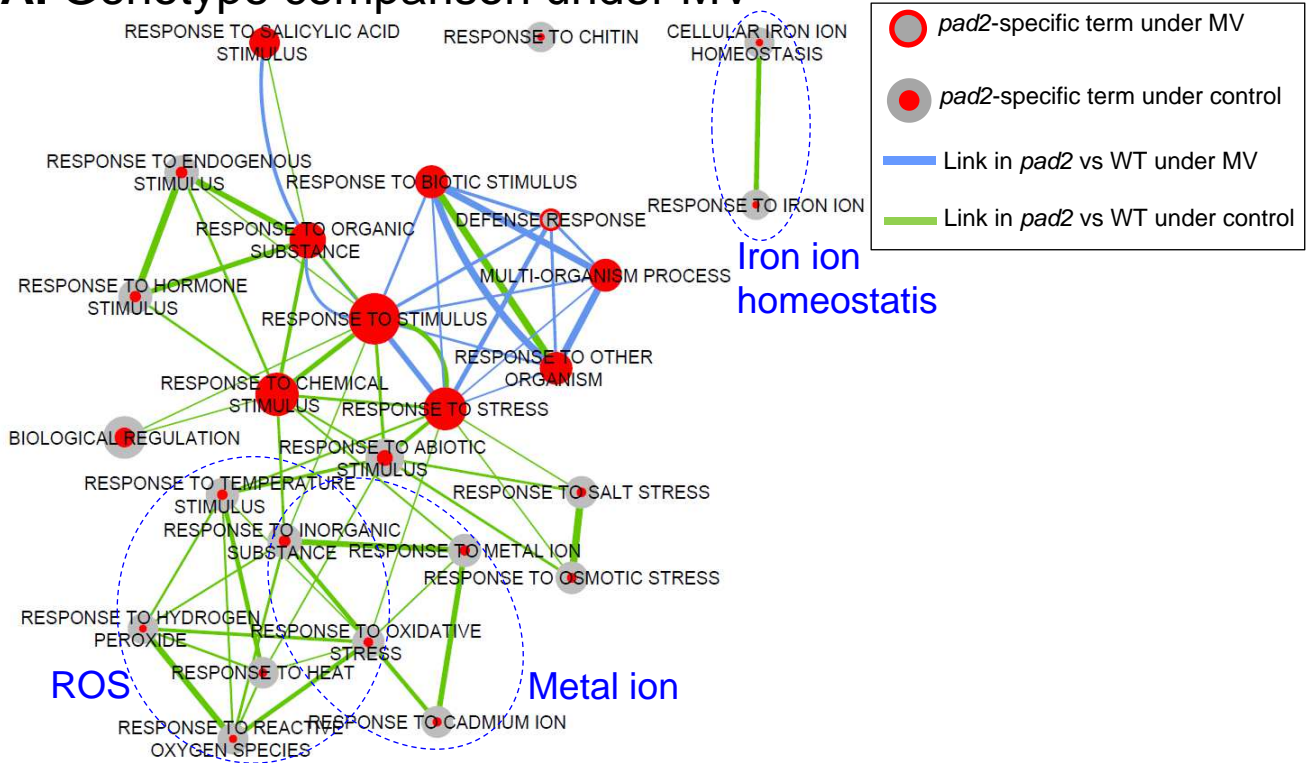

## B. Genotype comparison under P-lim

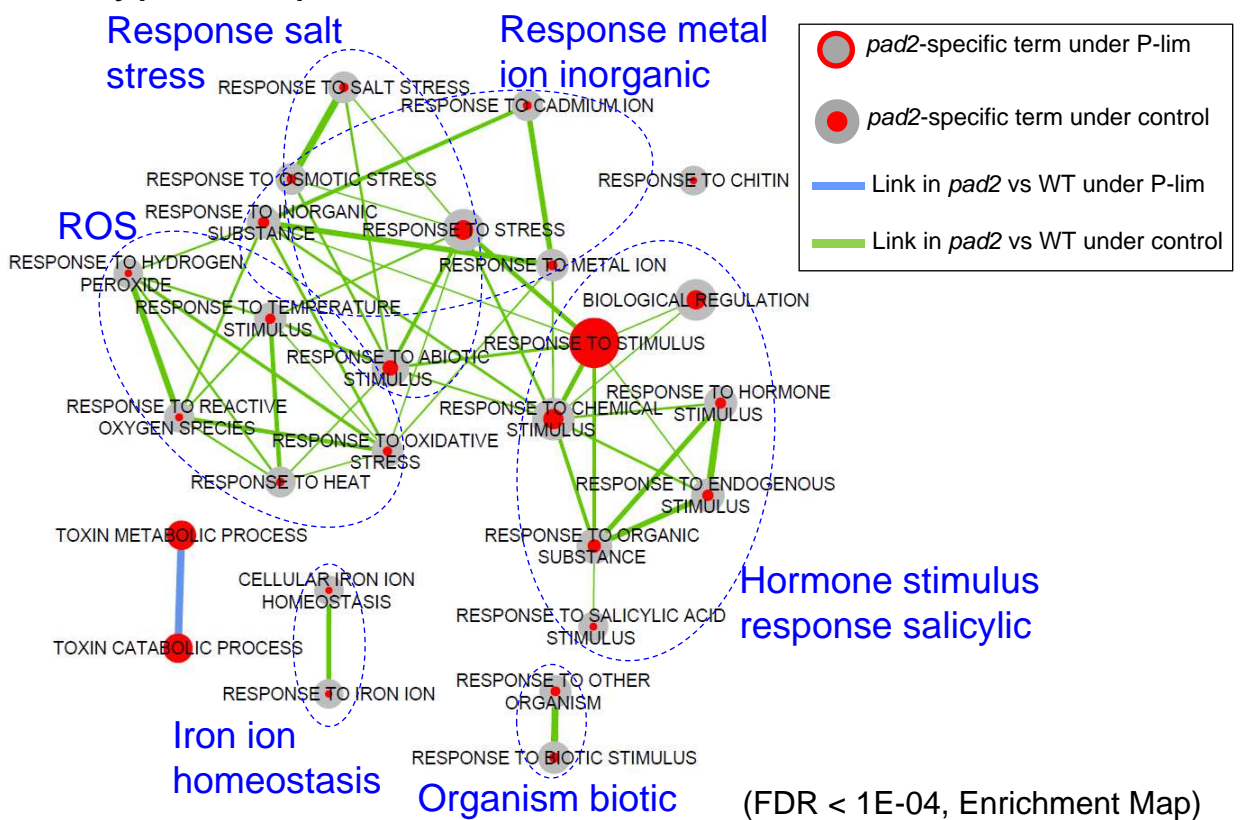



**A**

Hormone metabolism

Treatment comparison

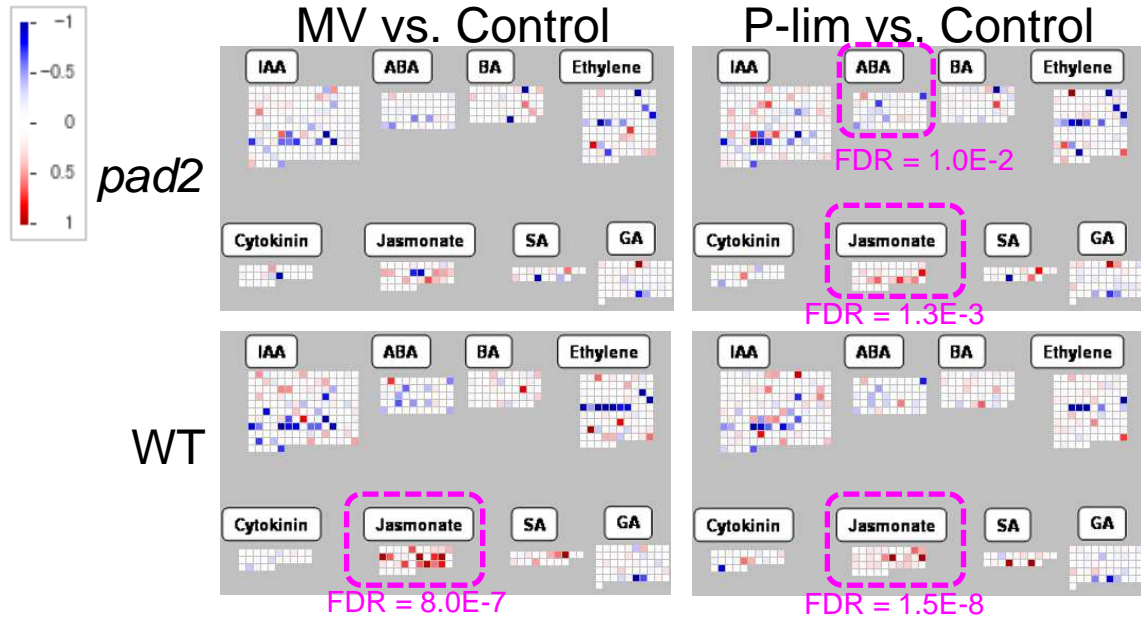**B**Genotype comparison (*pad2* vs. WT)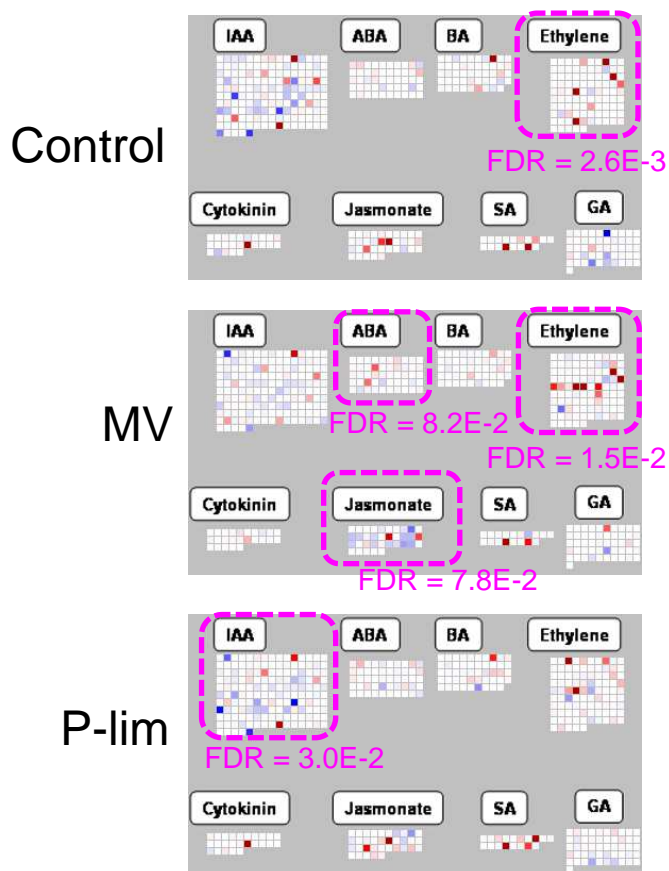

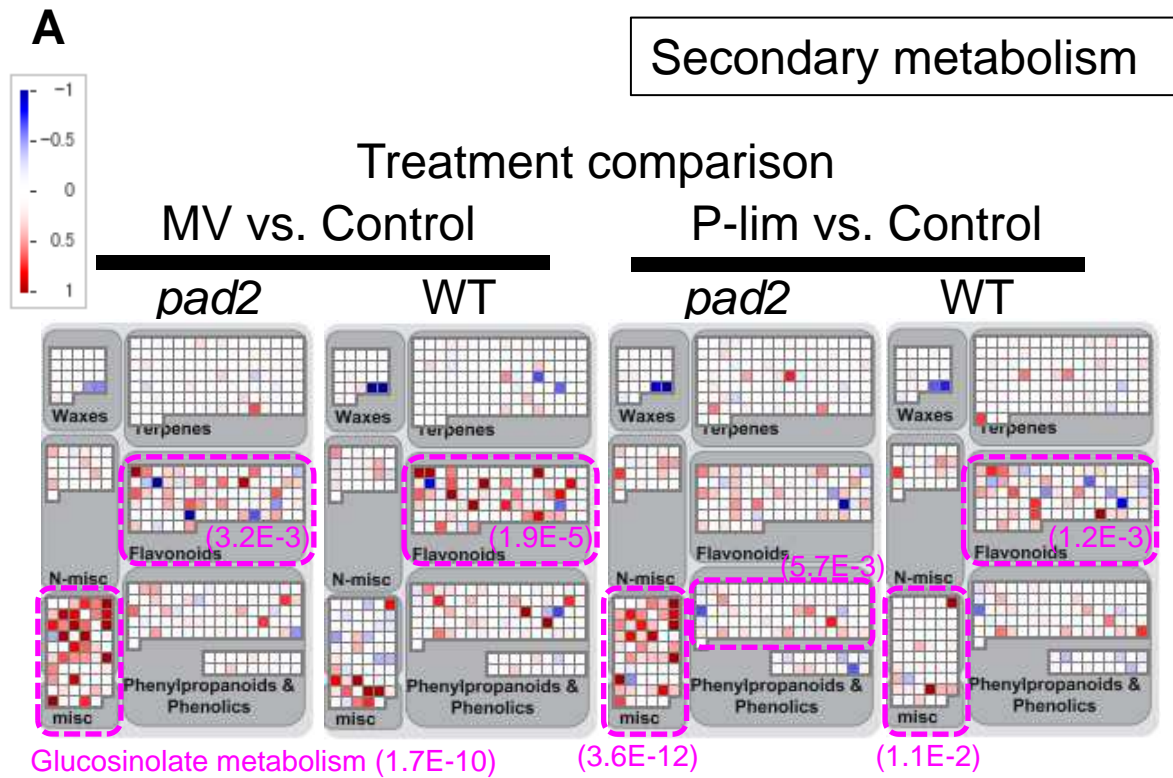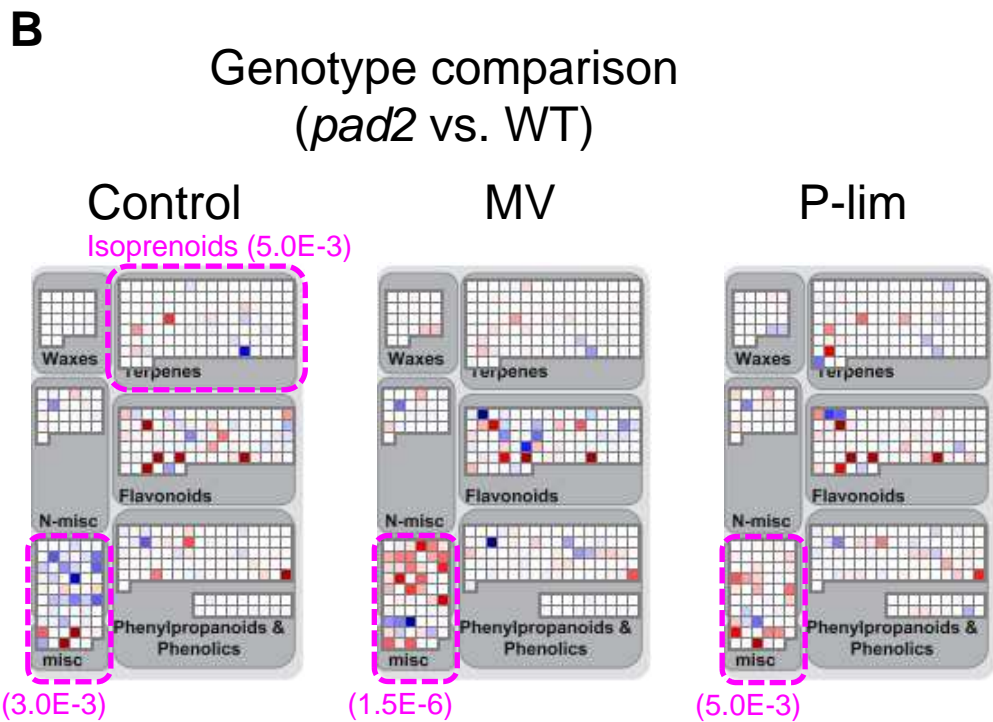

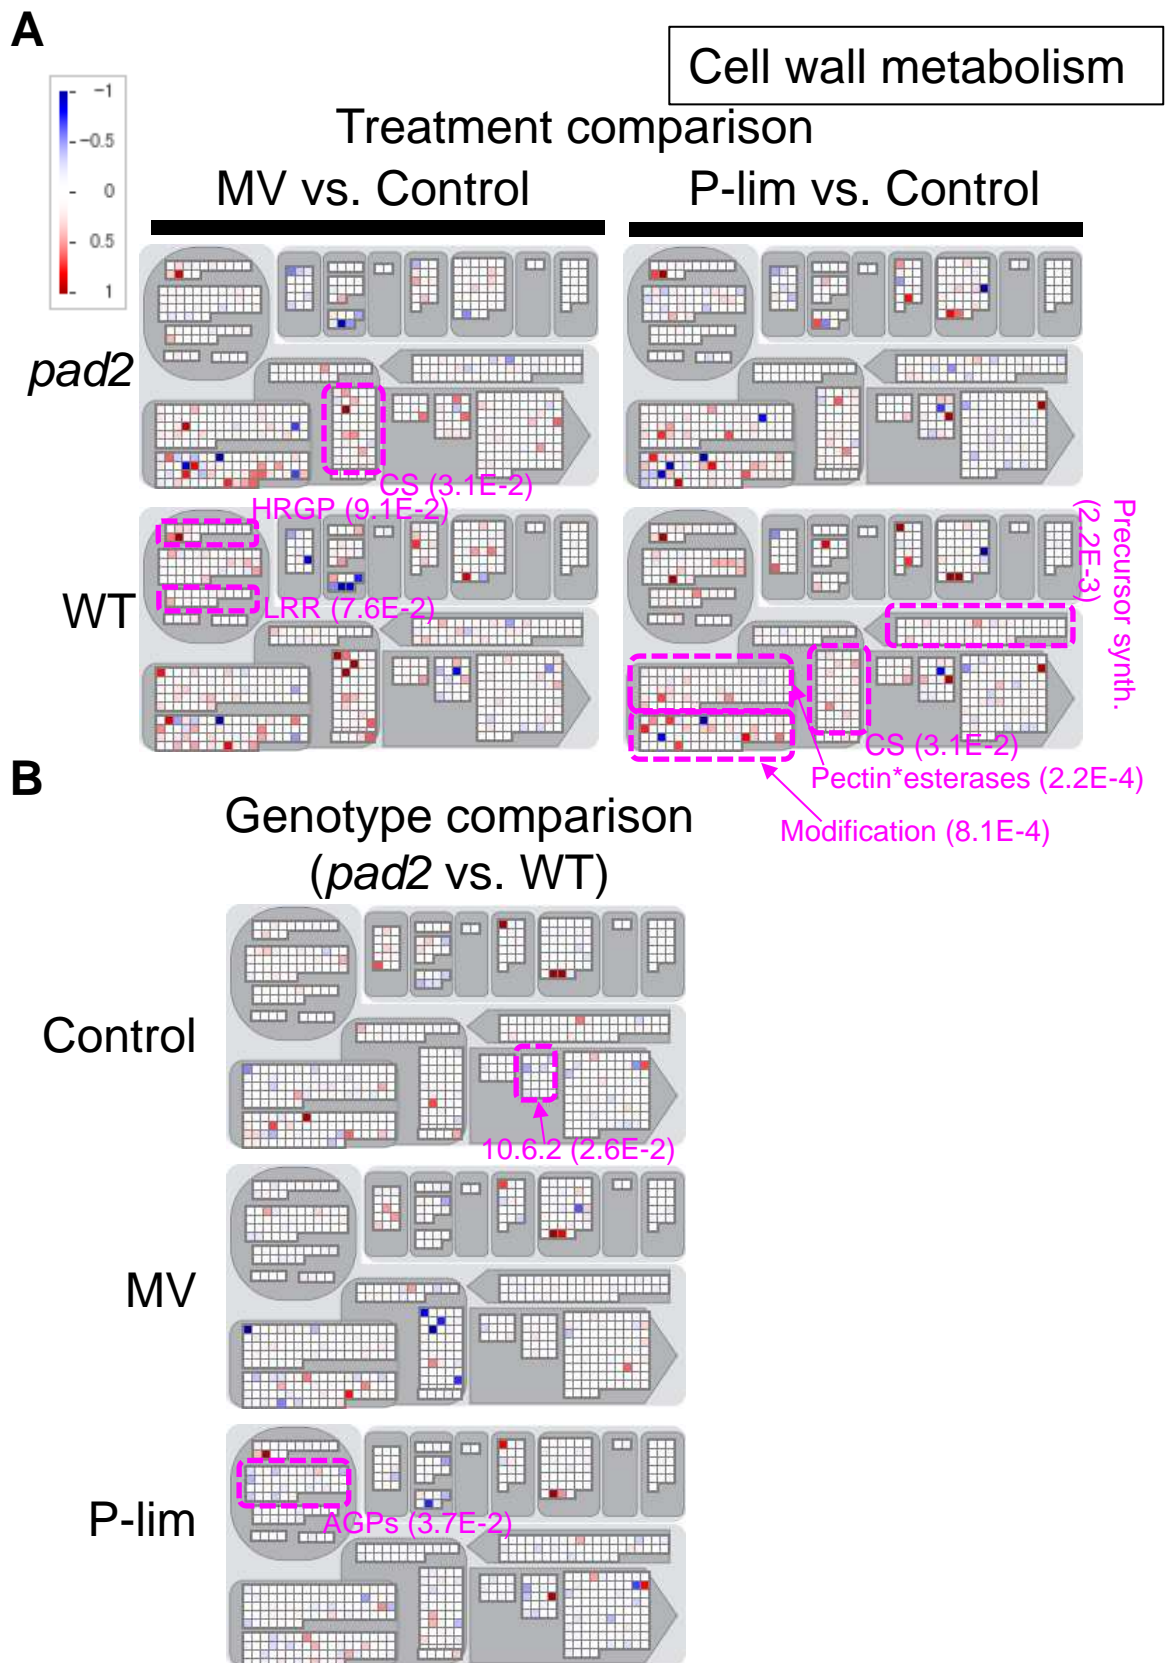

**A****Treatment comparison**

Down-regulated genes under MV

Down-regulated genes under P-lim

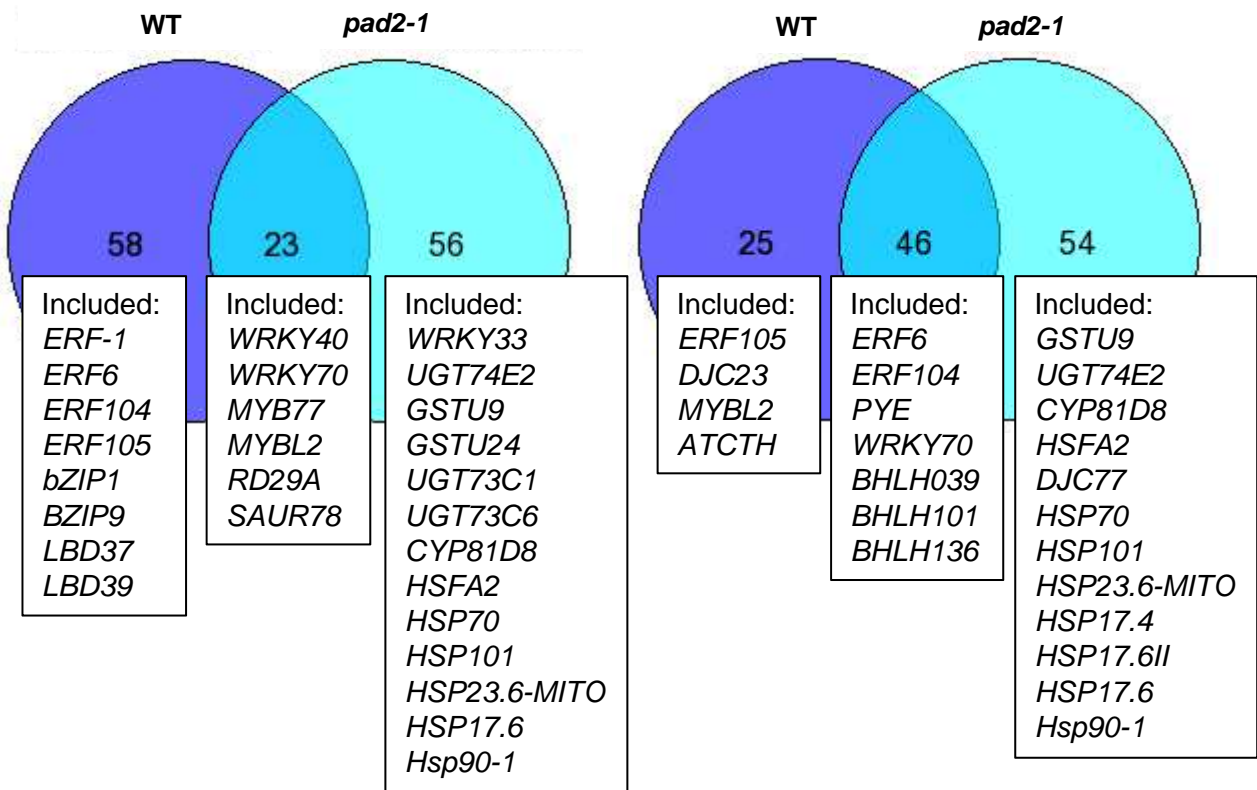**B****Genotype comparison**Down-regulation in *pad2-1*

under no-stress      MV-treatment

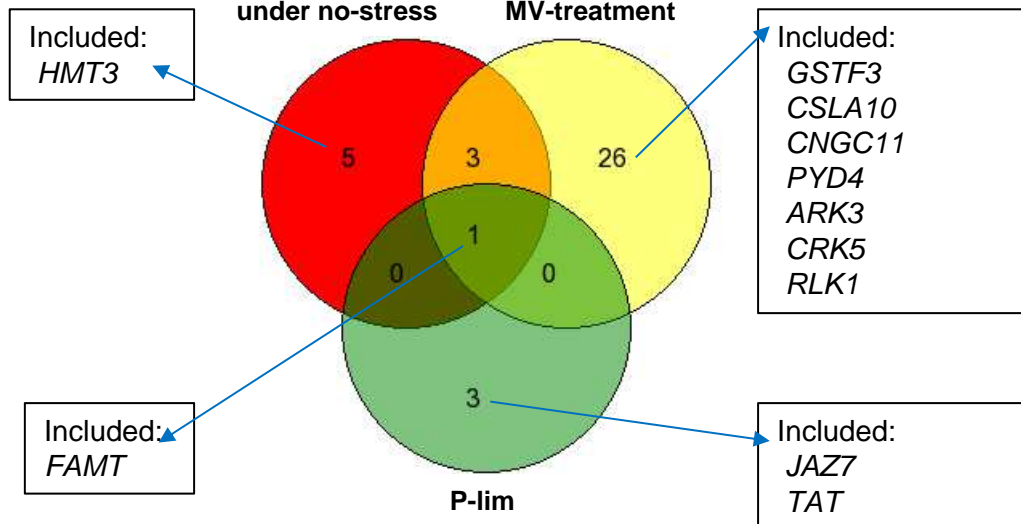(log<sub>2</sub>fold-change ≤ 1 and FDR < 0.05, LIMMA)
